# Supplementary material
Source: PubMed Central journal article supplement (PMC2631287)
Supplement: JCI0932661sd.pdf [file JCI0932661sd.pdf]

**Supplementary Figure 1. Gluconeogenic gene expression during fetal and postnatal development in the liver of the NHP.** Real time PCR was used to quantitate glucose 6- Phosphatase (G6P; a), fructose bisphosphatase 1 (FBP1; b), phosphoenolpyruvate carboxykinase (PEPCK; c), and peroxisome proliferator-activated receptor gamma coactivator- 1(PGC1 $\alpha$ ; d) mRNA in the liver at different developmental stages. G130 – gestation day 130, n = 4; G170 – gestational day 170, n = 2; P30 – postnatal day 30, n = 4; Adult (2-12 years of age), n = 9

**a****G6P mRNA in Liver**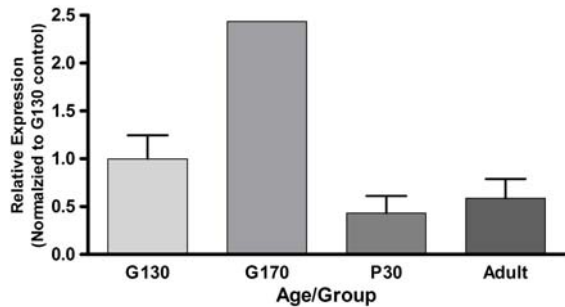**b****FBP1 mRNA in Liver**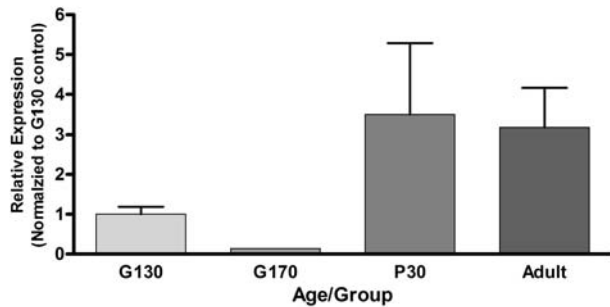**c****PEPCK mRNA in Liver**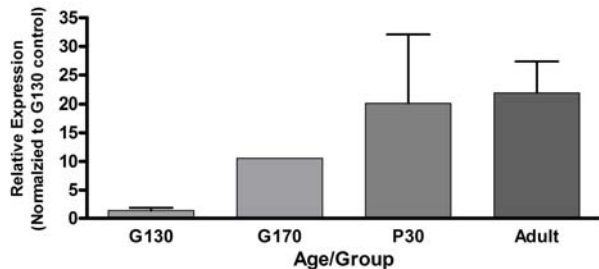**d****PGC1 mRNA in Liver**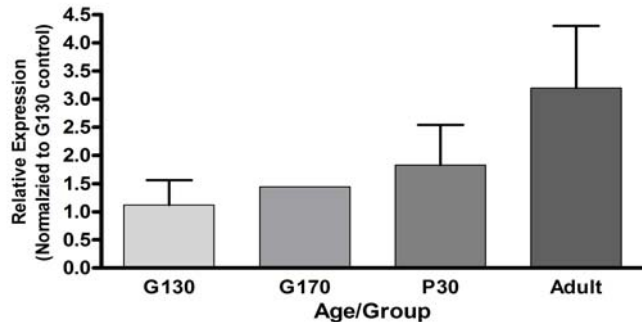

**Supplementary Table 1: Adult female macaque prepregnancy data.**

| Pre-pregnancy Data          | Control     | HFD                 |                |
|-----------------------------|-------------|---------------------|----------------|
|                             |             | Resistant           | Sensitive      |
| Weight (kg)                 | 8.3 ± 0.3   | 8.6 ± 0.3           | 9.5 ± 0.4*     |
| %Body Fat                   | 15.8 ± 1.5  | 15.8 ± 2.4          | 28.8 ± 5.8*    |
| Insulin (µu/mL)             | 23.8 ± 4.4  | 38.8 ± 14.8         | 26.7 ± 2.8     |
| Glucose (mg/dL)             | 66.7 ± 2.5  | 68.3 ± 3.3          | 64.7 ± 3.2     |
| IAUC                        | 2764 ± 513  | 4162 ± 1355         | 6584 ± 1106 ** |
| GAUC                        | 4993 ± 238  | 4802 ± 544          | 5948 ± 722     |
| Leptin (ng/mL)              | 2.00 ± 0.46 | 2.07 ± 0.56         | 2.57 ± 0.71    |
| Total Triglycerides (mg/mL) | 0.83 ± 0.11 | 0.69 ± .03          | 0.90 ± 0.05    |
| True Triglycerides (mg/mL)  | 0.84 ± 0.09 | 0.54 ± 0.03         | 0.63 ± 0.07    |
| Glycerol (mg/mL)            | 0.18 ± 0.02 | 0.15 ± 0.01         | 0.34 ± 0.04**  |
| <b>Sample size (n)</b>      | 17          | 8                   | 10             |
|                             |             | HFY4 - prepregnancy |                |
|                             |             | Resistant           | Sensitive      |
| Weight (kg)                 |             | 8.17 ± 0.38         | 12.55 ± 1.10*  |
| Insulin (µu/mL)             |             | 11.78 ± 2.65        | 76.53 ± 30.91  |
| Glucose (mg/dL)             |             | 56.7 ± 1.7          | 73.8 ± 9.1     |
| IAUC                        |             | 1840 ± 485          | 7745 ± 1014**  |
| GAUC                        |             | 6076 ± 296          | 7189 ± 1339    |
| Leptin (ng/mL)              |             | 1.23 ± 0.32         | 8.06 ± 2.53*   |
| Total Triglycerides (mg/mL) |             | 1.31 ± 0.18         | 1.32 ± 0.15    |
| True Triglycerides (mg/mL)  |             | 0.92 ± 0.16         | 0.85 ± 0.08    |
| Glycerol (mg/mL)            |             | 0.39 ± 0.02         | 0.47 ± 0.08    |
| <b>Sample size (n)</b>      |             | 3                   | 4              |

The values represent the mean  $\pm$  SEM. The values are only from adult animals that became pregnant. HFD animals were on the HF diet for 2-4 years at the time of the data collection. Control animals were age matched. HFY4 represents only those animals maintained on the HFD for 4 years. Statistical comparisons were done using an ANOVA, with a Tukey's posthoc analysis.

\* -indicates  $p < 0.05$ ; \*\* - indicates  $p < 0.01$  vs. controls.

**Supplementary Table 2: Plasma levels of cytokines in fetal control and HF diet offspring.**

| Target       | Alternate | Control     | HF diet     | p value |
|--------------|-----------|-------------|-------------|---------|
| C5a          |           | 0.14 ± 0.01 | 0.43 ± 0.15 | 0.20    |
| CD40 ligand* | CD154     | 0.11 ± 0.02 | 0.30 ± 0.06 | 0.03*   |
| G-CSF*       | CSFβ      | 0.14 ± 0.01 | 0.28 ± 0.05 | 0.05*   |
| GM-CSF       | CSFα      | 0.14 ± 0.02 | 0.27 ± 0.05 | 0.08    |
| GROα         | CXCL1     | 0.16 ± 0.02 | 0.47 ± 0.18 | 0.22    |
| I-309        | CCL1      | 0.11 ± 0.01 | 0.28 ± 0.07 | 0.13    |
| IFNγ         |           | 0.11 ± 0.02 | 0.28 ± 0.07 | 0.15    |
| IL-1α*       | IL-1F1    | 0.10 ± 0.02 | 0.29 ± 0.04 | 0.01*   |
| IL-1β*       | IL-1F2    | 0.08 ± 0.02 | 0.25 ± 0.06 | 0.05*   |
| IL-1ra       | IL-1F3    | 0.36 ± 0.13 | 0.68 ± 0.13 | 0.16    |
| IL-2         |           | 0.14 ± 0.03 | 0.25 ± 0.06 | 0.17    |
| IL-4         |           | 0.13 ± 0.03 | 0.25 ± 0.08 | 0.22    |
| IL-5*        |           | 0.09 ± 0.02 | 0.27 ± 0.05 | 0.03*   |
| IL-6         |           | 0.07 ± 0.01 | 0.27 ± 0.07 | 0.11    |
| IL-8         | CXCL8     | 0.09 ± 0.01 | 0.50 ± 0.21 | 0.19    |
| IL-10*       |           | 0.07 ± 0.03 | 0.22 ± 0.03 | 0.02*   |
| IL-12 p70*   |           | 0.11 ± 0.03 | 0.25 ± 0.03 | 0.02*   |
| IL-13        |           | 0.30 ± 0.07 | 0.31 ± 0.06 | 0.86    |
| IL-16        | LCF       | 0.17 ± 0.03 | 0.41 ± 0.12 | 0.11    |
| IL-17        |           | 0.13 ± 0.03 | 0.28 ± 0.07 | 0.12    |
| IL-17E*      |           | 0.09 ± 0.02 | 0.31 ± 0.06 | 0.02*   |
| IL-23        |           | 0.09 ± 0.02 | 0.27 ± 0.07 | 0.14    |
| IL-27*       |           | 0.11 ± 0.01 | 0.28 ± 0.05 | 0.03*   |
| IL-32α*      |           | 0.09 ± 0.02 | 0.28 ± 0.05 | 0.02*   |

|                  |         |             |             |       |
|------------------|---------|-------------|-------------|-------|
| IP-10            | CXCL10  | 0.12 ± 0.03 | 0.30 ± 0.03 | 0.01* |
| I-TAC*           | CXCL11  | 0.17 ± 0.03 | 0.39 ± 0.07 | 0.05* |
| MCP-1            | CCL2    | 0.15 ± 0.02 | 0.30 ± 0.05 | 0.07  |
| MIF              | GIF     | 2.63 ± 0.51 | 4.85 ± 0.86 | 0.09  |
| MIP-1 $\alpha$ * | CCL3    | 0.26 ± 0.06 | 1.00 ± 0.20 | 0.02* |
| MIP-1 $\beta$    | CCL4    | 0.11 ± 0.00 | 0.27 ± 0.06 | 0.12  |
| RANTES           | CCL5    | 0.50 ± 0.08 | 3.92 ± 1.02 | 0.08  |
| SDF-1*           | CXCL12  | 0.13 ± 0.02 | 0.30 ± 0.06 | 0.05* |
| Serpin E1        | PAI-1   | 1.36 ± 0.22 | 3.44 ± 0.77 | 0.06  |
| sICAM-1          | CD54    | 0.09 ± 0.01 | 0.25 ± 0.06 | 0.11  |
| sTREM-1*         |         | 0.12 ± 0.02 | 0.30 ± 0.06 | 0.04* |
| TNF $\alpha$ *   | TNFSF1A | 0.12 ± 0.02 | 0.27 ± 0.05 | 0.04* |

Proteome Profiler™ Cytokine Array. Values represent the mean ± S.E.M. of arbitrary units. \* indicates a significant change as determined by Student's t test; p =/ < 0.05.

Controls. n = 3; HFD, n = 4.

|                      | Control     | OHFD        |
|----------------------|-------------|-------------|
| IRS1                 | 1.06 ± 0.18 | 0.95 ± 0.32 |
| IRS1(S307)           | 1.34 ± 0.23 | 1.10 ± 0.17 |
| SerIRS1/total        | 1.28 ± 0.5  | 1.29 ± 0.21 |
| IRS-2                | 2.78 ± 0.33 | 2.71 ± 0.12 |
| PGC-1                | 1.54 ± 0.14 | 1.42 ± 0.09 |
| SREBP-1c             | 1.00 ± 0.03 | 1.10 ± 0.07 |
| ppar alpha           | 1.13 ± 0.07 | 1.27 ± 0.19 |
| ppar gamma           | 0.92 ± 0.09 | 0.85 ± 0.09 |
| C/EBP (LAP)          | 0.65 ± 0.08 | 0.60 ± 0.04 |
| C/EBP (LIP)          | 0.78 ± 0.11 | 0.84 ± 0.17 |
| CREB                 | 1.70 ± 0.31 | 1.59 ± 0.07 |
| pCREB                | 0.71 ± 0.16 | 0.89 ± 0.07 |
| pCreb/total          | 0.41 ± 0.05 | 0.56 ± 0.06 |
| pFoxo1a              | 1.08 ± 0.10 | 1.18 ± 0.08 |
| Foxo1a               | 0.94 ± 0.08 | 1.11 ± 0.06 |
| pFoxo1a/total        | 1.20 ± 0.12 | 1.14 ± 0.14 |
| Foxo1 (nuclear:cyto) | 2.14 ± 0.26 | 1.51 ± 0.28 |
| pACC (Thr79)         | 1.92 ± 0.19 | 0.02 ± 0.33 |
| pAkt/total           | 0.61 ± 0.07 | 0.69 ± 0.1  |
| Akt                  | 1.20 ± 0.07 | 1.14 ± 0.21 |
| pAkt(S473)           | 0.73 ± 0.09 | 0.79 ± 0.07 |
| pmTOR                | 1.70 ± 0.23 | 1.59 ± 0.22 |
| mTOR                 | 1.06 ± 0.03 | 1.19 ± 0.11 |
| pmTOR/total          | 1.62 ± 0.22 | 1.35 ± 0.18 |
| pJNK2/3              | 0.62 ± 0.09 | 0.83 ± 0.11 |
| JNK2/3               | 1.03 ± 0.05 | 0.94 ± 0.04 |
| JNK1                 | 0.98 ± 0.07 | 0.89 ± 0.05 |
| phospho p44          | 0.74 ± 0.15 | 0.78 ± 0.11 |
| phospho p42          | 0.77 ± 0.35 | 1.11 ± 0.23 |
| p38(T180-Y182)       | 1.07 ± 0.11 | 1.28 ± 0.18 |
| cFOS                 | 1.16 ± 0.15 | 1.77 ± 0.22 |
| TNFalpha (precursor) | 1.12 ± 0.15 | 1.15 ± 0.23 |
| TNFalpha (mature)    | 1.09 ± 0.1  | 1.32 ± 0.41 |
| nuclear NFKB         | 0.64 ± 0.11 | 0.47 ± 0.09 |
| pIKKalpha            | 1.16 ± 0.08 | 1.23 ± 0.11 |
| pIKKbeta             | 0.89 ± 0.1  | 0.90 ± 0.11 |
| CYP2E                | 1.00 ± 0.09 | 1.25 ± 0.20 |
| BIP                  | 1.01 ± 0.2  | 0.94 ± 0.1  |
| XBP-1                | 1.22 ± 0.16 | 0.96 ± 0.09 |

**Supplementary Table 3: Immunoblot Analysis of Fetal Liver.** Signaling proteins were measured for major metabolic pathways in the fetal liver as described in the methods section. Data is the Mean ± SEM and was analyzed by t-test. No significant differences were found in the abundance or phosphorylation state. n=4-15 per group.
